# Supplementary material for: A colorimetric and fluorescent signaling probe for assaying Pd2+ in practical samples
Source: Royal Society of Chemistry journal article supplement (doi:10.1039/d3ra05549c), 2023-01-01
Supplement: d3ra05549c1.pdf [file d3ra05549c1.pdf]

## Electronic Supplementary Information

### **A colorimetric and fluorescent signaling probe for assaying Pd<sup>2+</sup> in practical samples**

Myung Gil Choi, Juyoung Han, Sangdoo Ahn\* and Suk-Kyu Chang\*

*Department of Chemistry, Chung-Ang University, Seoul 06974, Republic of Korea*

#### **Contents**

##### **Experimental details**

- Table S1.** Representative Pd-selective reaction-based probes reported previously
- Table S2.** Photophysical properties of **Res-DT** in the presence and absence of Pd<sup>2+</sup> ions
- Table S3.** Analysis of Pd<sup>2+</sup> ions in a Pd-containing catalyst and a drug candidate
- 
- Fig. S1.** Time-dependent Pd<sup>2+</sup> signaling performance of **Res-DT**.
- Fig. S2.** Time-dependent Pd<sup>2+</sup> signaling behavior of **Res-DT** in solutions containing (a) SDS, (b) CTAB, or (c) Tween 20 as a signal-boosting surfactant.
- Fig. S3.** Precipitation profile illustrating the Pd<sup>2+</sup> signaling of **Res-DT** in solutions containing SDS or Tween 20 as the surfactant under illumination with a red laser.
- Fig. S4.** Changes in the absorbance ratio of **Res-DT** ( $A_{572}/A_{452}$ ) in the presence of common anions.
- Fig. S5.** Changes in the absorbance ratio of **Res-DT** ( $A_{572}/A_{452}$ ) in the presence of common oxidants.
- Fig. S6.** Effect of competitive anions on the Pd<sup>2+</sup> signaling performance of **Res-DT**.
- Fig. S7.** Changes in the fluorescence enhancement of **Res-DT** at 591 nm with the incorporation of common anions. Inset: fluorescence spectra of **Res-DT**.
- Fig. S8.** TLC profile of **Res-DT** (spot A), **Res-DT** with Pd<sup>2+</sup> (spot B), and resorufin

(spot C).

- Fig. S9.** FAB mass spectrum of the Pd<sup>2+</sup> signaling product of **Res-DT**.
- Fig. S10.** FE-SEM image and associated EDX maps and data of the precipitate formed from the Pd<sup>2+</sup> signaling of **Res-DT**.
- Fig. S11.** Changes in the absorbance ratio of **Res-DT** ( $A_{572}/A_{452}$ ) in the presence of diverse Pd species.
- Fig. S12.** Calibration curve for Pd<sup>2+</sup> determination using the fluorescence emission at 591 nm.
- Fig. S13.** Time-dependent Pd<sup>2+</sup> signaling activity of **Res-DT**, as characterized by the absorbance ratio of the signaling solution ( $A_{572}/A_{452}$ ).
- Fig. S14.** Plot illustrating the changes in color channel levels (RGB) in the presence of a Pd-containing drug candidate.
- Fig. S15.** <sup>1</sup>H NMR spectrum of **Res-DT** in CDCl<sub>3</sub> (600 MHz).
- Fig. S16.** <sup>13</sup>C NMR spectrum of **Res-DT** in CDCl<sub>3</sub> (150 MHz).
- Fig. S17.** High-resolution mass spectrum of **Res-DT**.

## Experimental details

### 1. General

Various materials including resorufin, phenyl chlorodithioformate, and Pd species such as Pd(OAc)<sub>2</sub>, PdCl<sub>2</sub>, Pd(PPh<sub>3</sub>)<sub>4</sub>, and K<sub>2</sub>PdCl<sub>6</sub> were obtained from Merck KGaA. The White catalyst (1,2-bis(phenylsulfinyl)ethane palladium(II) acetate) and 2-picolinic acid were also sourced from Merck KGaA and were used without further purification. <sup>1</sup>H and <sup>13</sup>C NMR measurements were performed using a Varian VNS NMR spectrometer. High-resolution mass spectrometry was conducted using a JEOL JMS-700 mass spectrometer with Fast atom bombardment (FAB) ionization. UV-vis and fluorescence signaling behavior were examined using Scinco S-3100 and FS-2 spectrophotometers, respectively. FE-SEM and EDX map images were obtained using Carl Zeiss SIGMA 300 microscopy equipped with Oxford EDX spectroscopy. The Pd-containing drug candidate was prepared according to a previously reported method.<sup>S1</sup>

**Table S1.** Representative Pd-selective reaction-based probes reported previously

| Mechanism    | Structure                                                                           | Signal                    | Conditions                                            | LOD     | Application                                                      | Merit                                                                                                                      | Ref. |
|--------------|-------------------------------------------------------------------------------------|---------------------------|-------------------------------------------------------|---------|------------------------------------------------------------------|----------------------------------------------------------------------------------------------------------------------------|------|
| Deallylation | 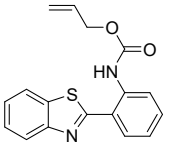   | Fluorescence              | CH <sub>3</sub> CN:PBS buffer<br>(8:2, v/v, pH 7.4)   | 2.6 nM  | Pd <sup>2+</sup> assay in tap water, river water, and wastewater | <ul style="list-style-type: none"> <li>• Environmental Pd sensing</li> <li>• Low LOD</li> </ul>                            | S2   |
|              |    | Colorimetry, fluorescence | PEG400:PBS buffer<br>(6:4, v/v, pH 7.4)               | 29.4 nM | Pd imaging in HeLa cells                                         | <ul style="list-style-type: none"> <li>• Naked-eye detectable</li> <li>• Bioimaging suitable</li> </ul>                    | S3   |
|              |    | Fluorescence              | THF:PBS buffer<br>(8:2, v/v, pH 7.4)                  | 9.0 nM  | Pd imaging in HeLa cells                                         | <ul style="list-style-type: none"> <li>• Bioimaging suitable</li> <li>• Low LOD</li> </ul>                                 | S4   |
|              |    | Colorimetry, fluorescence | DMSO:PBS buffer<br>(8:2, v/v, pH 7.4)                 | 2.2 nM  | Pd <sup>2+</sup> imaging in HeLa cells                           | <ul style="list-style-type: none"> <li>• Naked-eye detectable</li> <li>• Bioimaging suitable</li> <li>• Low LOD</li> </ul> | S5   |
|              |  | Fluorescence              | CH <sub>3</sub> CN:HEPES buffer<br>(8:2, v/v, pH 7.2) | 40 nM   | Pd <sup>2+</sup> imaging in PC3 cells                            | <ul style="list-style-type: none"> <li>• Bioimaging suitable</li> </ul>                                                    | S6   |
|              |  | Colorimetry, fluorescence | pH 7.4 phosphate buffer with 1% DMSO                  | 7.4 nM  | Pd imaging in HeLa cells                                         | <ul style="list-style-type: none"> <li>• Naked-eye detectable</li> <li>• Bioimaging suitable</li> <li>• Low LOD</li> </ul> | S7   |

**Table S1.** Representative Pd-selective reaction-based probes reported previously (*continued*)

| Mechanism             | Structure                                                                           | Signal                    | Conditions                                                         | LOD     | Application                                                               | Merit                                                                                                                          | Ref. |
|-----------------------|-------------------------------------------------------------------------------------|---------------------------|--------------------------------------------------------------------|---------|---------------------------------------------------------------------------|--------------------------------------------------------------------------------------------------------------------------------|------|
| Depropargylation      | 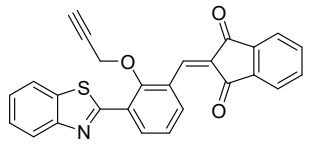   | Colorimetry, fluorescence | THF:HEPES buffer (5:2, v/v, pH 7.4)                                | 14.6 nM | Fabricating a paper-based test strip                                      | <ul style="list-style-type: none"> <li>• Naked-eye detectable</li> <li>• Paper strip</li> </ul>                                | S8   |
|                       |    | Fluorescence              | pH 7.4 PBS buffer with 0.5% EtOH                                   | 25 nM   | Pd <sup>2+</sup> imaging in Hep G2 and HL60 cells                         | <ul style="list-style-type: none"> <li>• Bioimaging suitable</li> </ul>                                                        | S9   |
| Claisen rearrangement |    | Fluorescence              | pH 10.0 Na <sub>2</sub> CO <sub>3</sub> /NaHCO <sub>3</sub> buffer | 1.4 μM  | Pd <sup>2+</sup> sensing in a three-way catalyst                          | <ul style="list-style-type: none"> <li>• Industrial Pd sensing</li> <li>• Low LOD</li> </ul>                                   | S10  |
| Dimerization          |    | Fluorescence              | CH <sub>3</sub> CN under basic conditions                          | 9.8 nM  | Pd <sup>2+</sup> assay in tap water and river water                       | <ul style="list-style-type: none"> <li>• Environmental Pd sensing</li> <li>• Low LOD</li> </ul>                                | S11  |
| Oxidative cyclization |  | Colorimetry, fluorescence | CH <sub>3</sub> CN                                                 | 940 nM  | Residual Pd detection in reactors                                         | <ul style="list-style-type: none"> <li>• Naked-eye detectable</li> <li>• Industrial Pd sensing</li> </ul>                      | S12  |
| Hydrolysis            |  | Colorimetry, fluorescence | DMSO:phosphate buffer (1:1, v/v, pH 7.0)                           | 10 nM   | Pd <sup>2+</sup> assay in a real drug (ibuprofen) and a drug intermediate | <ul style="list-style-type: none"> <li>• Naked-eye detectable</li> <li>• Pharmaceutical analysis</li> <li>• Low LOD</li> </ul> | S13  |

**Table S1.** Representative Pd-selective reaction-based probes reported previously (*continued*)

| Mechanism  | Structure                                                                         | Signal                       | Conditions                                     | LOD   | Application                                                                       | Merit                                                                                                                                                                                               | Ref.         |
|------------|-----------------------------------------------------------------------------------|------------------------------|------------------------------------------------|-------|-----------------------------------------------------------------------------------|-----------------------------------------------------------------------------------------------------------------------------------------------------------------------------------------------------|--------------|
| Hydrolysis | 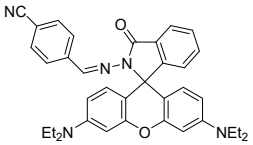 | Colorimetry,<br>fluorescence | CH <sub>3</sub> CN:H <sub>2</sub> O (3:1, v/v) | 57 nM | Pd <sup>2+</sup> imaging in<br>MCF7 cells                                         | <ul style="list-style-type: none"> <li>• Naked-eye detectable</li> <li>• Bioimaging suitable</li> </ul>                                                                                             | S14          |
|            |  | Colorimetry,<br>fluorescence | pH 7.4 PBS buffer with<br>2% DMSO              | 10 nM | Pd <sup>2+</sup> assay in a Pd-<br>containing catalyst<br>and a drug<br>candidate | <ul style="list-style-type: none"> <li>• Naked-eye detectable</li> <li>• Pharmaceutical analysis</li> <li>• Industrial Pd sensing</li> <li>• Scanner-assisted sensing</li> <li>• Low LOD</li> </ul> | This<br>work |

**Table S2.** Photophysical properties of **Res-DT** in the presence and absence of Pd<sup>2+</sup> ions

| Sample                          | Absorbance             |                                             | Fluorescence           |                          |
|---------------------------------|------------------------|---------------------------------------------|------------------------|--------------------------|
|                                 | $\lambda_{\text{max}}$ | Molar extinction coefficient ( $\epsilon$ ) | $\lambda_{\text{max}}$ | Quantum yield ( $\Phi$ ) |
| <b>Res-DT</b>                   | 452 nm                 | 12,300 M <sup>-1</sup> ·cm <sup>-1</sup>    | 586 nm                 | 0.009                    |
| <b>Res-DT + Pd<sup>2+</sup></b> | 572 nm                 | 64,500 M <sup>-1</sup> ·cm <sup>-1</sup>    | 591 nm                 | 0.58                     |

**Table S3.** Analysis of Pd<sup>2+</sup> ions in a Pd-containing catalyst and a drug candidate

| Analyte                                        | Pd <sup>2+</sup> added<br>( $\mu\text{M}$ ) | Method involving UV–vis spectrometry                     |          | Method featuring an office scanner                       |          |
|------------------------------------------------|---------------------------------------------|----------------------------------------------------------|----------|----------------------------------------------------------|----------|
|                                                |                                             | Pd <sup>2+</sup> detected<br>( $\mu\text{M}$ , $n = 3$ ) | Recovery | Pd <sup>2+</sup> detected<br>( $\mu\text{M}$ , $n = 3$ ) | Recovery |
| Pd-containing catalyst<br>(the White catalyst) | 0                                           | Not detected                                             | -        | Not detected                                             | -        |
|                                                | 1.0                                         | 0.92 $\pm$ 0.02                                          | 92.0%    | 1.07 $\pm$ 0.01                                          | 107.2%   |
|                                                | 2.0                                         | 2.02 $\pm$ 0.04                                          | 101.3%   | 1.88 $\pm$ 0.03                                          | 94.1%    |
| Pd-containing drug<br>candidate                | 0                                           | Not detected                                             | -        | Not detected                                             | -        |
|                                                | 1.0                                         | 0.91 $\pm$ 0.02                                          | 91.0%    | 1.04 $\pm$ 0.01                                          | 103.8%   |
|                                                | 2.0                                         | 1.99 $\pm$ 0.05                                          | 99.8%    | 1.94 $\pm$ 0.02                                          | 97.4%    |

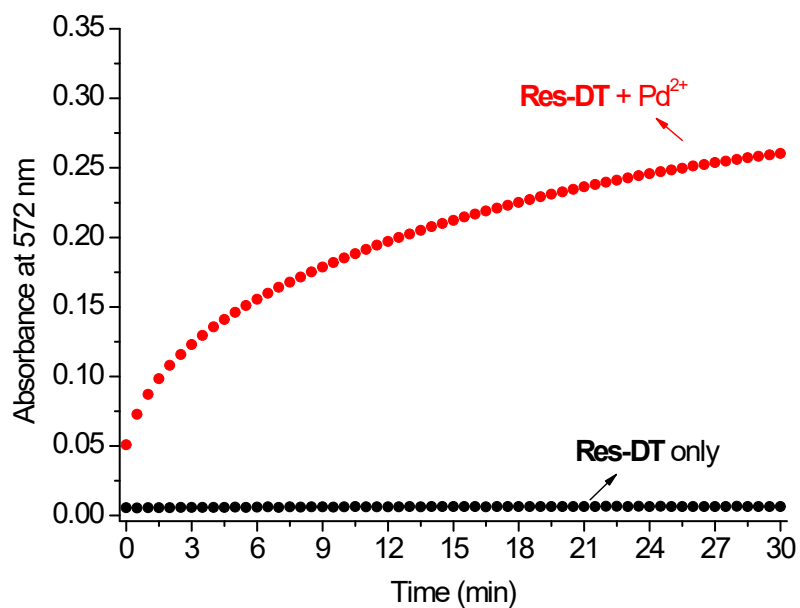

**Fig. S1.** Time-dependent Pd<sup>2+</sup> signaling performance of **Res-DT**. [Res-DT] = 5.0 μM, [Pd<sup>2+</sup>] = 25 μM, [PBS pH 7.4] = 10.0 mM in an aqueous solution containing 2% (v/v) DMSO.

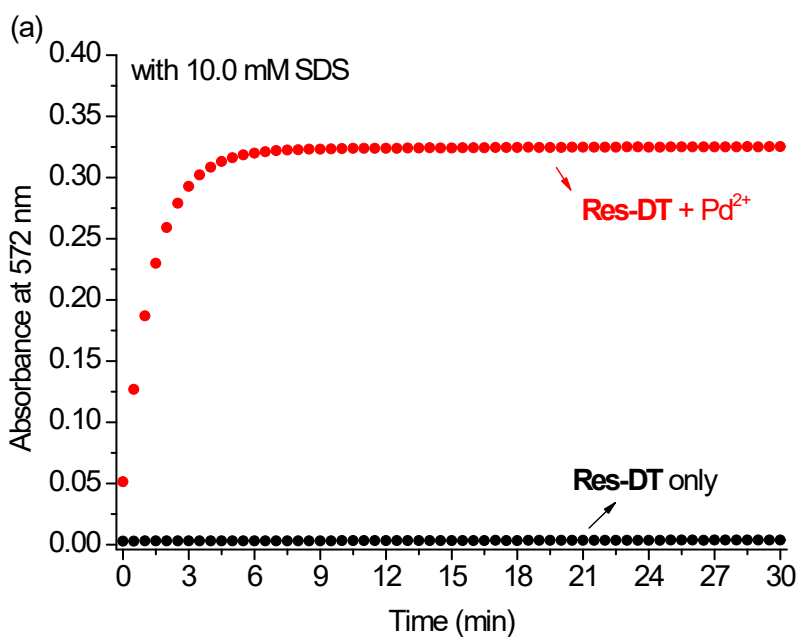

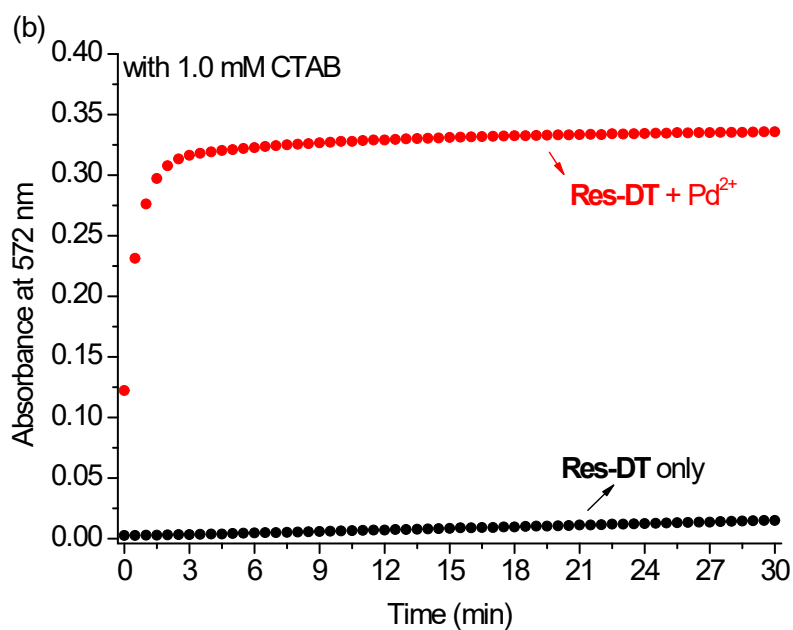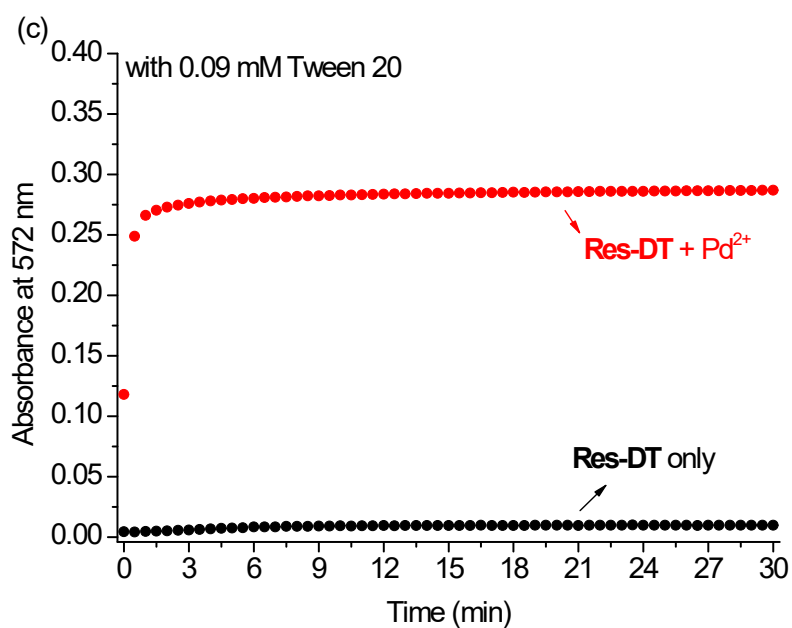

**Fig. S2.** Time-dependent Pd<sup>2+</sup> signaling behavior of **Res-DT** in solutions containing (a) SDS, (b) CTAB, or (c) Tween 20 as a signal-boosting surfactant. [Res-DT] = 5.0 μM, [Pd<sup>2+</sup>] = 25 μM, [SDS] = 10.0 mM, [CTAB] = 1.0 mM, [Tween 20] = 0.09 mM, [PBS pH 7.4] = 10.0 mM in an aqueous solution containing 2% (v/v) DMSO.



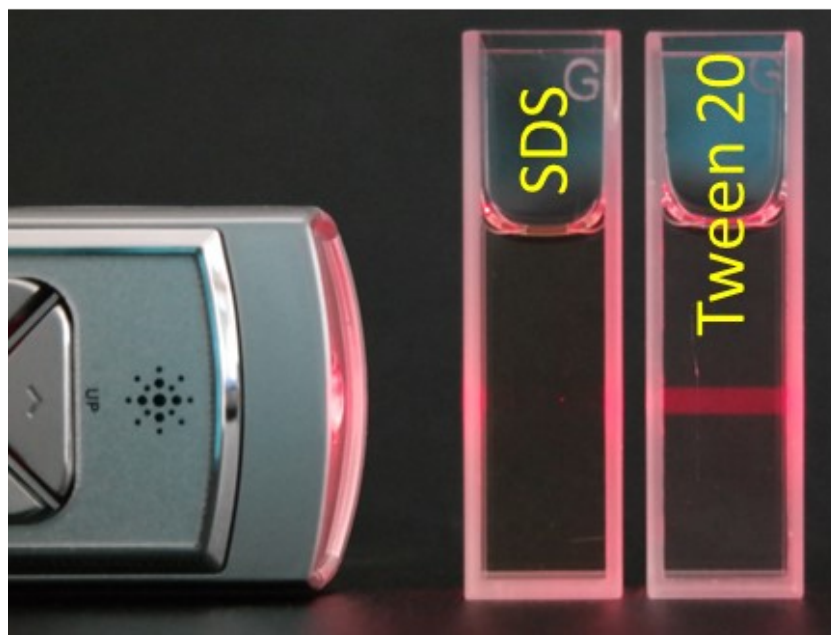

**Fig. S3.** Precipitation profile illustrating the  $\text{Pd}^{2+}$  signaling of **Res-DT** in solutions containing SDS or Tween 20 as the surfactant under illumination with a red laser.  $[\text{Res-DT}] = 5.0 \mu\text{M}$ ,  $[\text{Pd}^{2+}] = 25 \mu\text{M}$ ,  $[\text{SDS}] = 10.0 \text{ mM}$ ,  $[\text{Tween 20}] = 0.09 \text{ mM}$ ,  $[\text{PBS pH 7.4}] = 10.0 \text{ mM}$  in an aqueous solution containing 2% (v/v) DMSO.

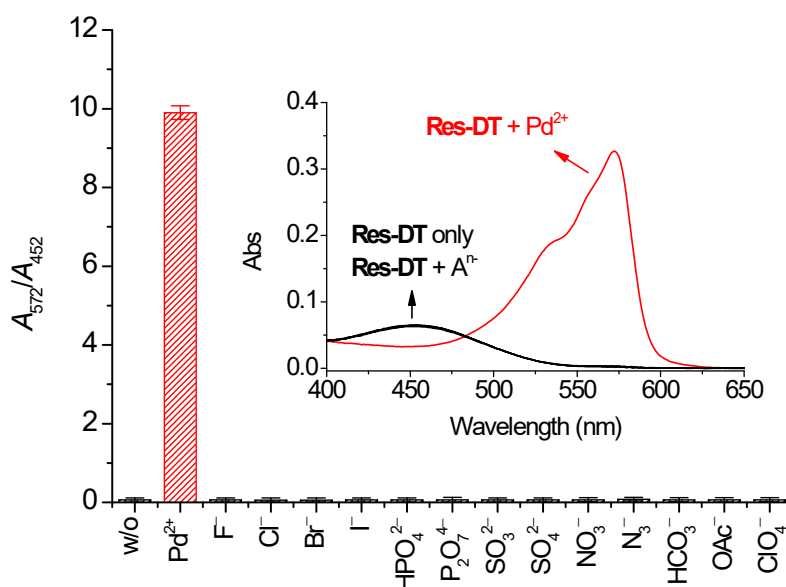

**Fig. S4.** Changes in the absorbance ratio of **Res-DT** ( $A_{572}/A_{452}$ ) in the presence of common anions. Inset: UV-vis spectra of **Res-DT**.  $[\text{Res-DT}] = 5.0 \mu\text{M}$ ,  $[\text{Pd}^{2+}] = [\text{A}^-] = 25 \mu\text{M}$ ,  $[\text{SDS}] = 10.0 \text{ mM}$ ,  $[\text{PBS pH 7.4}] = 10.0 \text{ mM}$  in an aqueous solution containing 2% (v/v) DMSO.

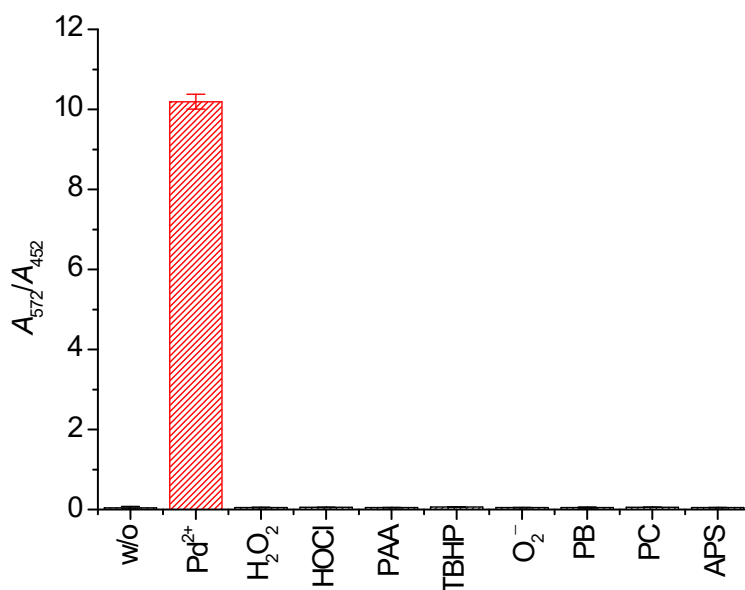

**Fig. S5.** Changes in the absorbance ratio of **Res-DT** ( $A_{572}/A_{452}$ ) in the presence of common oxidants. [**Res-DT**] = 5.0  $\mu\text{M}$ , [ $\text{Pd}^{2+}$ ] = [oxidant] = 25  $\mu\text{M}$ , [SDS] = 10.0 mM, [PBS pH 7.4] = 10.0 mM in an aqueous solution containing 2% (v/v) DMSO. PAA = peracetic acid, TBHP = *tert*-butyl hydroperoxide, PB = sodium perborate, PC = sodium percarbonate, APS = ammonium persulfate.

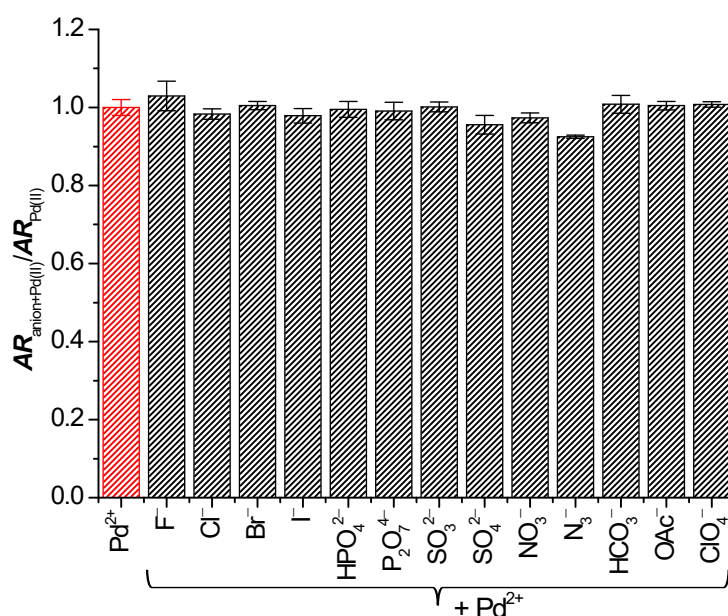

**Fig. S6.** Effect of competitive anions on the  $\text{Pd}^{2+}$  signaling performance of **Res-DT**. [**Res-DT**] = 5.0  $\mu\text{M}$ , [ $\text{Pd}^{2+}$ ] = [ $\text{A}^{n-}$ ] = 25  $\mu\text{M}$ , [SDS] = 10.0 mM, [PBS pH 7.4] = 10.0 mM in an aqueous solution containing 2% (v/v) DMSO. **AR** denotes the absorbance ratio  $A_{572}/A_{452}$ .

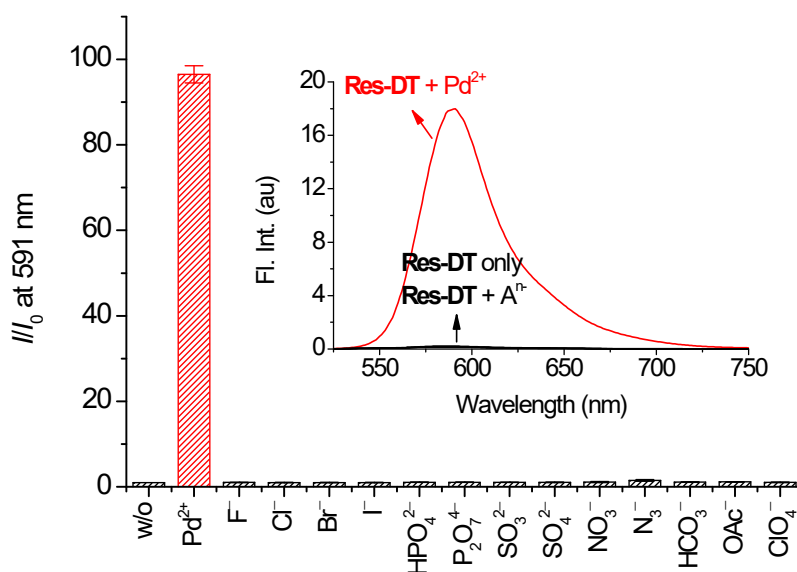

**Fig. S7.** Changes in the fluorescence enhancement of **Res-DT** at 591 nm with the incorporation of common anions. Inset: fluorescence spectra of **Res-DT**. [**Res-DT**] = 5.0  $\mu$ M, [**Pd**<sup>2+</sup>] = [**A**<sup>n-</sup>] = 25  $\mu$ M, [SDS] = 10.0 mM, [PBS pH 7.4] = 10.0 mM in an aqueous solution containing 2% (v/v) DMSO.  $\lambda_{\text{ex}}$  = 485 nm.

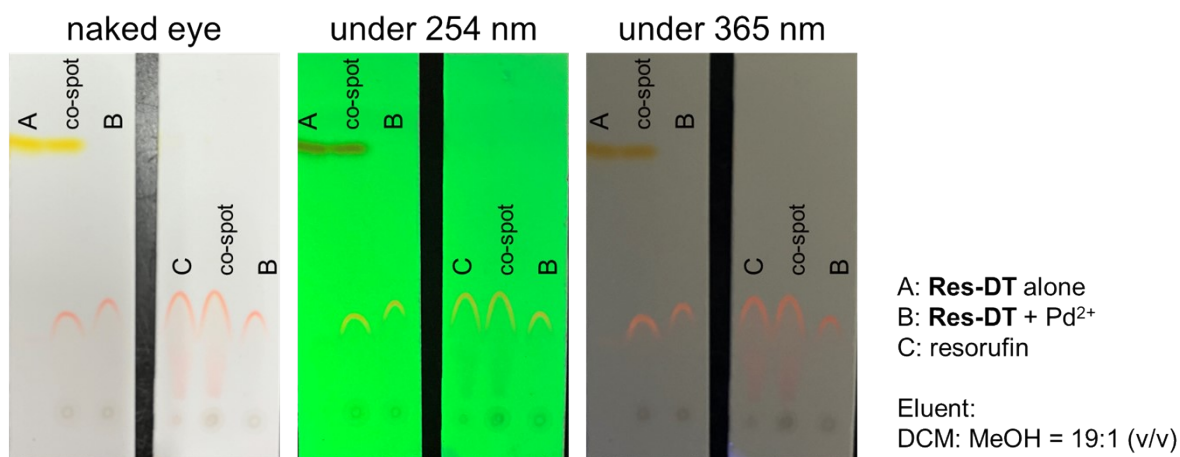

**Fig. S8.** TLC profile of **Res-DT** (spot A), **Res-DT** with Pd<sup>2+</sup> (spot B), and resorufin (spot C).

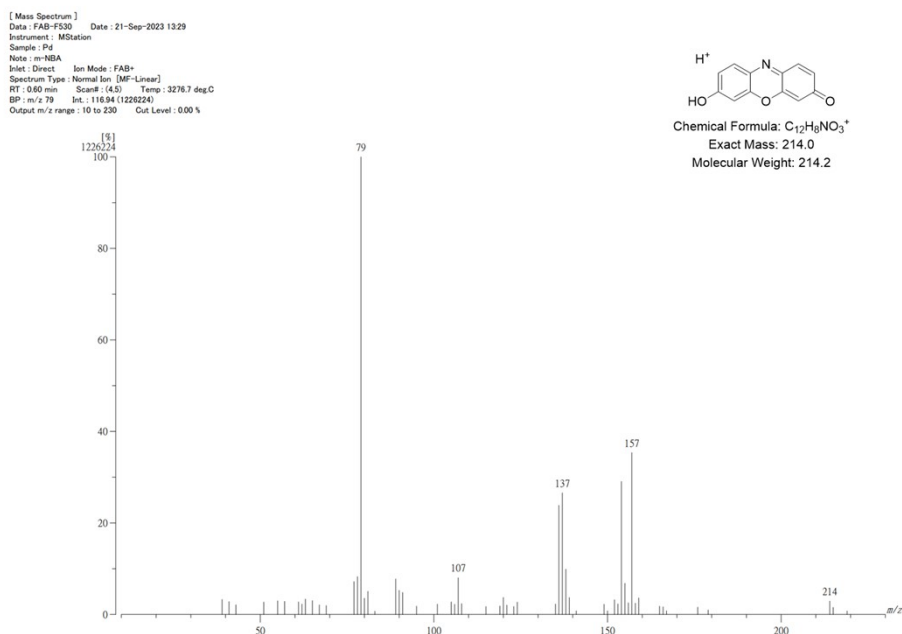

**Fig. S9.** FAB mass spectrum of the  $Pd^{2+}$  signaling product of **Res-DT**.

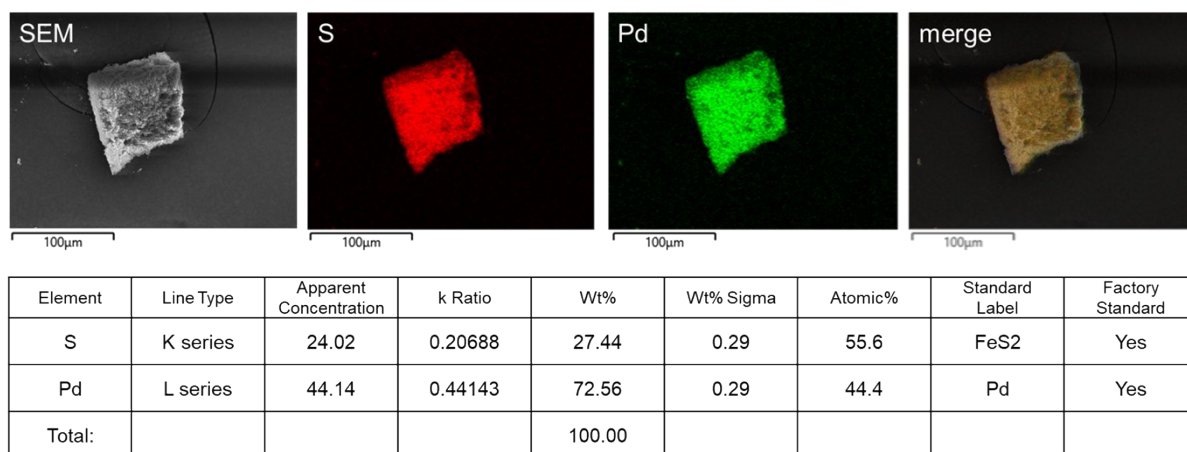

**Fig. S10.** FE-SEM image and associated EDX maps and data of the precipitate formed from the  $Pd^{2+}$  signaling of **Res-DT**.

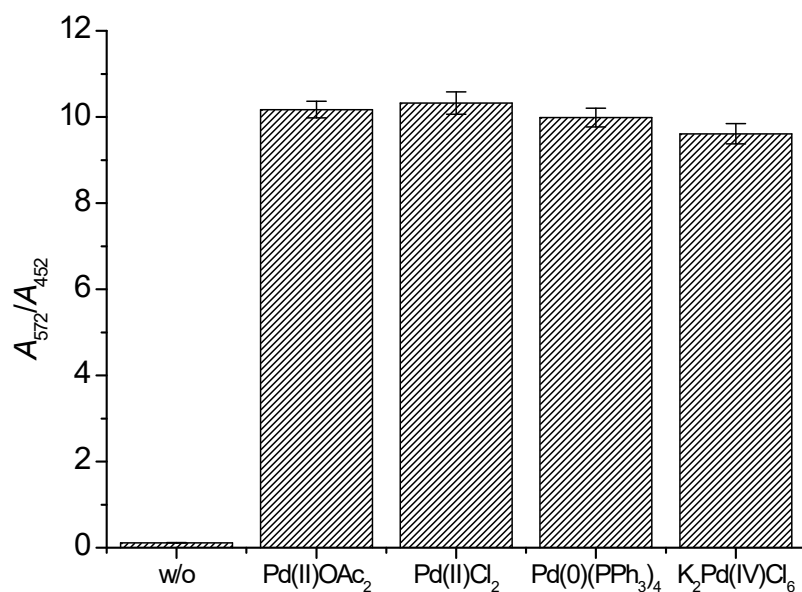

**Fig. S11.** Changes in the absorbance ratio of **Res-DT** ( $A_{572}/A_{452}$ ) in the presence of diverse Pd species. [Res-DT] = 5.0  $\mu$ M, [Pd species] = 25  $\mu$ M, [SDS] = 10.0 mM, [PBS pH 7.4] = 10.0 mM in an aqueous solution containing 2% (v/v) DMSO.

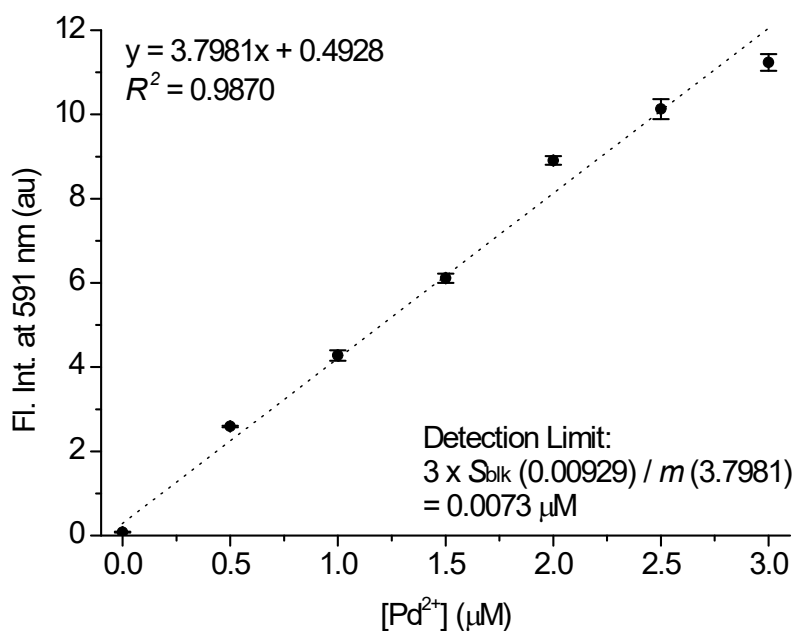

**Fig. S12.** Calibration curve for Pd<sup>2+</sup> determination using the fluorescence emission at 591 nm. [Res-DT] = 5.0  $\mu$ M, [Pd<sup>2+</sup>] = 0–3.0  $\mu$ M, [SDS] = 10.0 mM, [PBS pH 7.4] = 10.0 mM in an aqueous solution containing 2% (v/v) DMSO.  $\lambda_{\text{ex}} = 485$  nm.

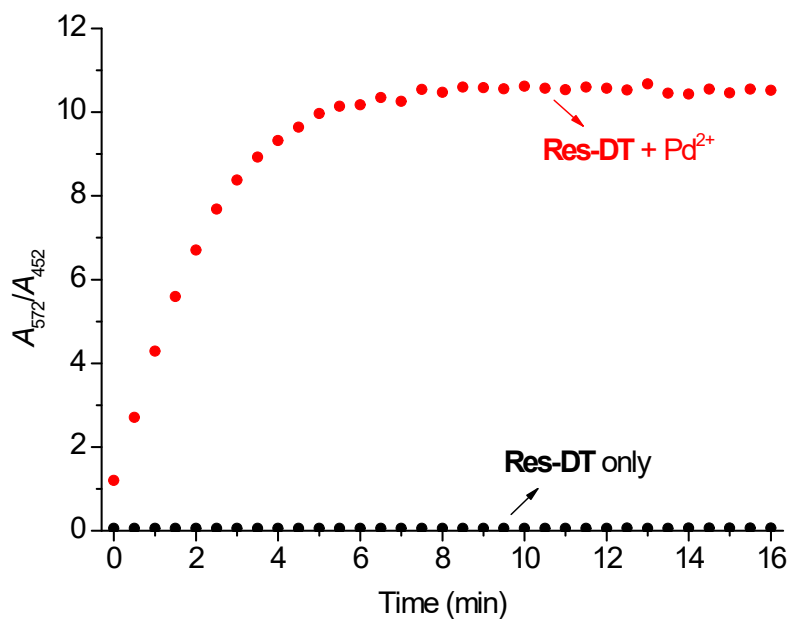

**Fig. S13.** Time-dependent Pd<sup>2+</sup> signaling activity of **Res-DT**, as characterized by the absorbance ratio of the signaling solution ( $A_{572}/A_{452}$ ). [**Res-DT**] = 5.0  $\mu\text{M}$ , [Pd<sup>2+</sup>] = 25  $\mu\text{M}$ , [SDS] = 10.0 mM, [PBS pH 7.4] = 10.0 mM in an aqueous solution containing 2% (v/v) DMSO.

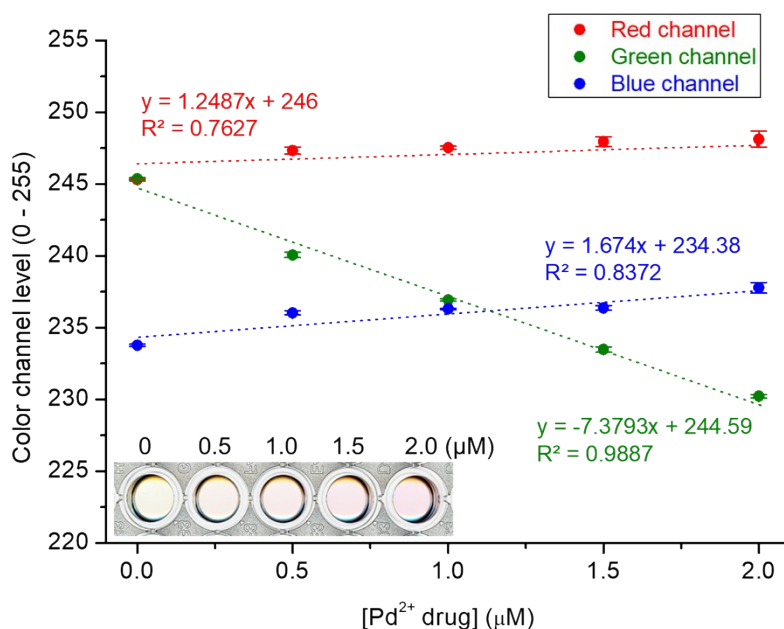

**Fig. S14.** Plot illustrating the changes in color channel levels (RGB) in the presence of a Pd-containing drug candidate. Inset: images of solutions with different Pd<sup>2+</sup> concentrations

captured using a scanner. [**Res-DT**] = 5.0  $\mu\text{M}$ , [ $\text{Pd}^{2+}$  drug] = 0–2.0  $\mu\text{M}$ , [SDS] = 10.0 mM, [PBS pH 7.4] = 10.0 mM in an aqueous solution containing 2% (v/v) DMSO.

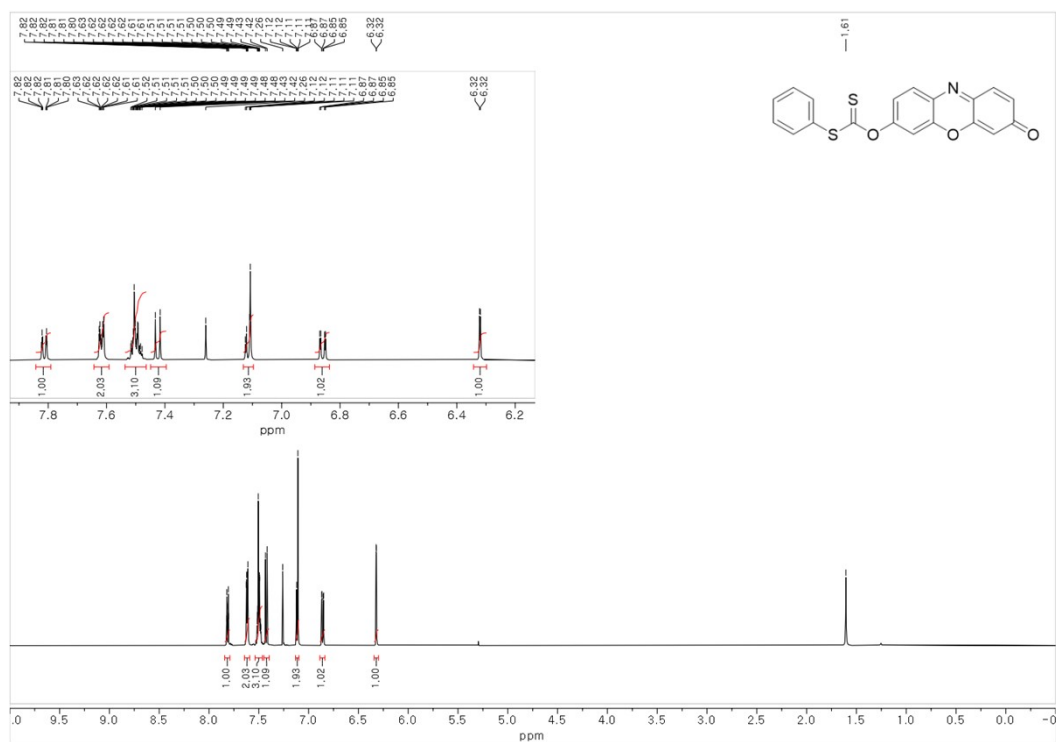

**Fig. S15.** <sup>1</sup>H NMR spectrum of **Res-DT** in CDCl<sub>3</sub> (600 MHz).

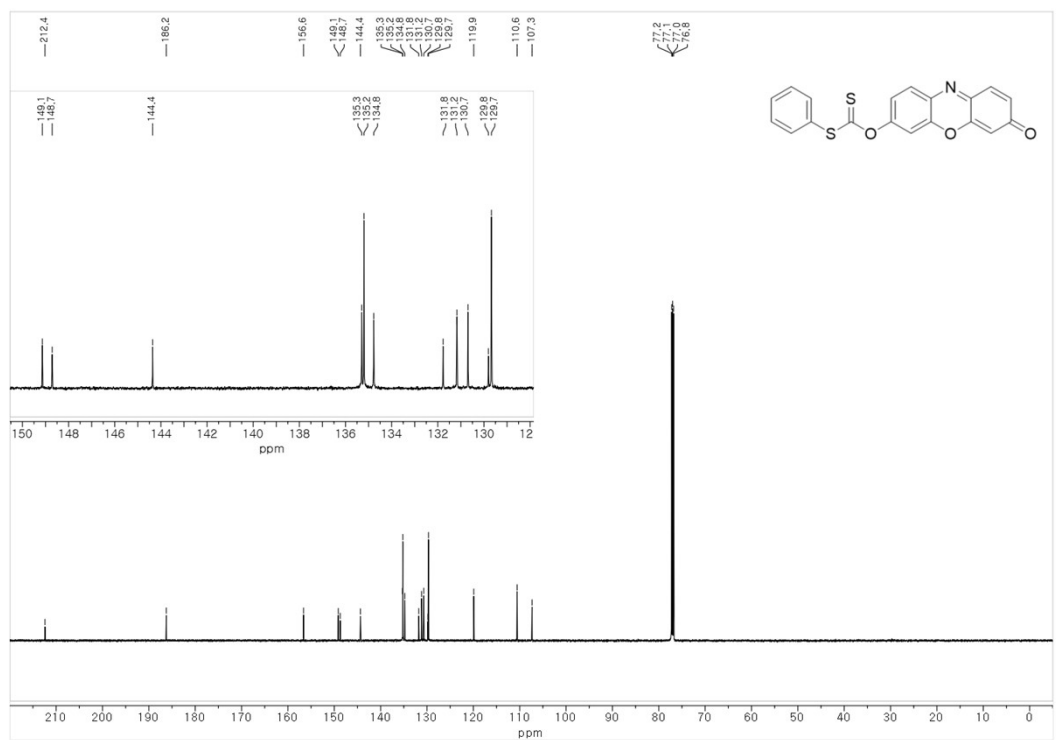

**Fig. S16.** <sup>13</sup>C NMR spectrum of **Res-DT** in CDCl<sub>3</sub> (150 MHz).



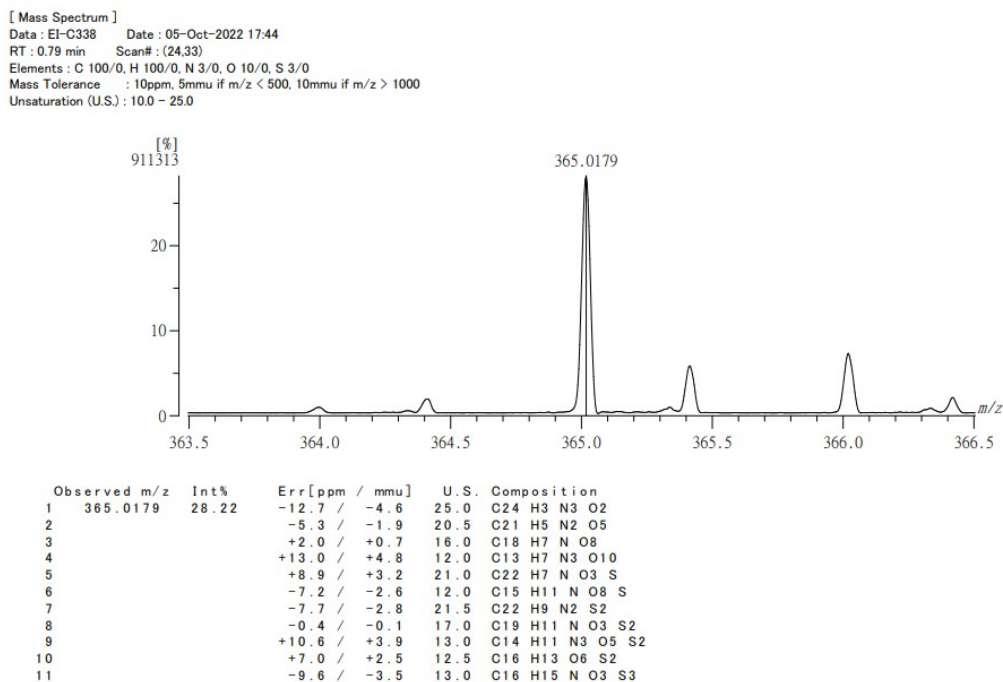

**Fig. S17.** High-resolution mass spectrum of **Res-DT**.

## References.

- [S1] F. A. Al-Saif, J. Y. Al-Humaidi, D. N. Binjawhar and M. S. Refat, *J. Mol. Struct.*, 2020, **1218**, 128547.
- [S2] M. Du, Y. Zhang, Y. Yu, H. Zhao, Y. Guo and Y. Yang, *Anal. Methods*, 2019, **11**, 6053–6061.
- [S3] Y. Zhang, M. Yang and M. Ji, *New J. Chem.*, 2020, **44**, 20434.
- [S4] W. Luo, J. Li and W. Liu, *Org. Biomol. Chem.*, 2017, **15**, 5846–5850.
- [S5] Q. Xia, S. Feng, D. Liu and G. Feng, *Sens. Actuator B-Chem*, 2018, **258**, 98–104.
- [S6] M. Kumar, N. Kumar and V. Bhalla, *RSC Adv.*, 2013, **3**, 1097–1102.
- [S7] J. Zhou, S. Xu, Z. Yu, X. Ye, X. Dong and W. Zhao, *Dyes Pigment.*, 2019, **170**, 107656.
- [S8] T. Chen, T. Wei, Z. Zhang, Y. Chen, J. Qiang, F. Wang and X. Chen, *Dyes Pigment.*, 2017, **140**, 392–398.
- [S9] W. Liu, J. Jiang, C. Chen, X. Tang, J. Shi, P. Zhang, K. Zhang, Z. Li, W. Dou, L. Yang and W. Liu, *Inorg. Chem.*, 2014, **53**, 12590–12594.
- [S10] X. Li, H. Huang, Y. Zhu, H. Zhao and Z. Wang, *RSC Adv.*, 2015, **5**, 105810–105813.
- [S11] A. Higashi, N. Kishikawa, K. Ohyama and N. Kuroda, *Tetrahedron Lett.*, 2017, **58**, 2774–2778.
- [S12] M. E. Jun and K. H. Ahn, *Org. Lett.*, 2010, **12**, 2790–2793.
- [S13] M. G. Choi, J.-Y. Seo, E. J. Cho, S.-K. Chang, *J. Photochem. Photobiol. A-Chem.*, 2022, **429**, 113920.
- [S14] A. Ghosh, S. Nandi, A. Sengupta, A. Chattopadhyay, S. Lohar and D. Das, *Inorg. Chim. Acta*, 2015, **436**, 52–56.
